# Supplementary material for: Effects of miR-103a-3p on the autophagy and apoptosis of cardiomyocytes by regulating Atg5
Source: PubMed Central journal article supplement — Int J Mol Med. 2019 Mar 12;43(5):1951–60. doi: 10.3892/ijmm.2019.4128 (PMC6443343; doi:10.3892/ijmm.2019.4128), 2019-03-12

Figure S1. Effect of *Atg5* on the expression of miR-103a-3p. The expression of miR-103a-3p in the *Atg5*-siRNA group was no different from that in the siRNA-Con group. There was no statistical difference between siRNA-Con and NC. All data are expressed as the mean  $\pm$  standard deviation. \*\*\* $P < 0.001$ , vs. NC. miR, microRNA; *Atg5*, autophagy-related 5; NC, negative control; H/R, hypoxia/reoxygenation; siRNA, small interfering RNA; Con, control.

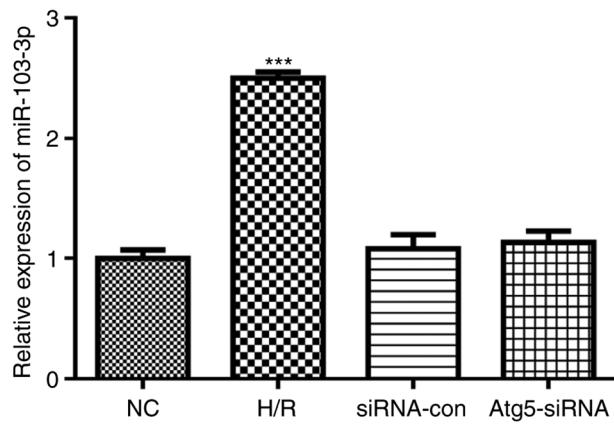

Supplement: IJMM-43-05-1951-supp.pdf [file IJMM-43-05-1951-supp.pdf]
